# Supplementary material for: Winter Rains Support Butterfly Diversity, but Summer Monsoon Rainfall Drives Post-Monsoon Butterfly Abundance in the Arid Southwest of the US
Source: MDPI journal article supplement (doi:10.3390/insects15010005), 2023-12-21
Supplement: s1 [file s1]

**Table S1: Survey site location, elevation, timing and years sampled.**

| Site                      | Location (°W, °N)  | Elevation (m) | Sampling Season | Sampling Year(s)                   |
|---------------------------|--------------------|---------------|-----------------|------------------------------------|
| Atascosa Highlands        | 31.4800, -111.1600 | 1353          | Summer/Fall     | 1983-2001                          |
| Boyce Thompson Arboretum  | 33.2950, -111.0946 | 1087          | Summer/Fall     | 2007-2021                          |
| Cottonwood                | 34.7380, -112.0353 | 1071          | Summer/Fall     | 2017-2021                          |
| Grand Canyon Desert View  | 36.0244, -111.8554 | 1832          | Spring          | 2015                               |
| Grand Canyon North Rim    | 36.1954, -112.0374 | 2112          | Summer/Fall     | 2019 & 2021                        |
| Grand Canyon South Rim    | 35.9890, -112.1221 | 2061          | Spring          | 2015                               |
|                           |                    |               | Summer/Fall     | 2014-2015                          |
| McDowell Sonoran Preserve | 33.7041, -111.7791 | 755           | Spring          | 2017-2021                          |
|                           |                    |               | Summer/Fall     | 2014-2021                          |
| Patagonia                 | 31.5073, -110.7331 | 1434          | Summer/Fall     | 1986-2021                          |
| Portal                    | 31.8500, -109.1667 | 2000          | Summer/Fall     | 1999-2005 & 2009 & 2012-2021       |
| Ramsey Canyon             | 31.4240, -110.2238 | 1460          | Summer/Fall     | 1981 & 1983-2021                   |
| Sabino Canyon             | 32.3656, -110.7774 | 1484          | Spring          | 2011-2018 & 2020-2021              |
|                           |                    |               | Summer/Fall     | 1991-1998 & 2000-2002 & 2008- 2021 |
| Santa Rita Mountains      | 31.7268, -110.8723 | 1786          | Summer/Fall     | 2011-2021                          |
| Sycamore Creek            | 33.8000, -111.4800 | 958           | Summer/Fall     | 1999-2000 & 2004                   |

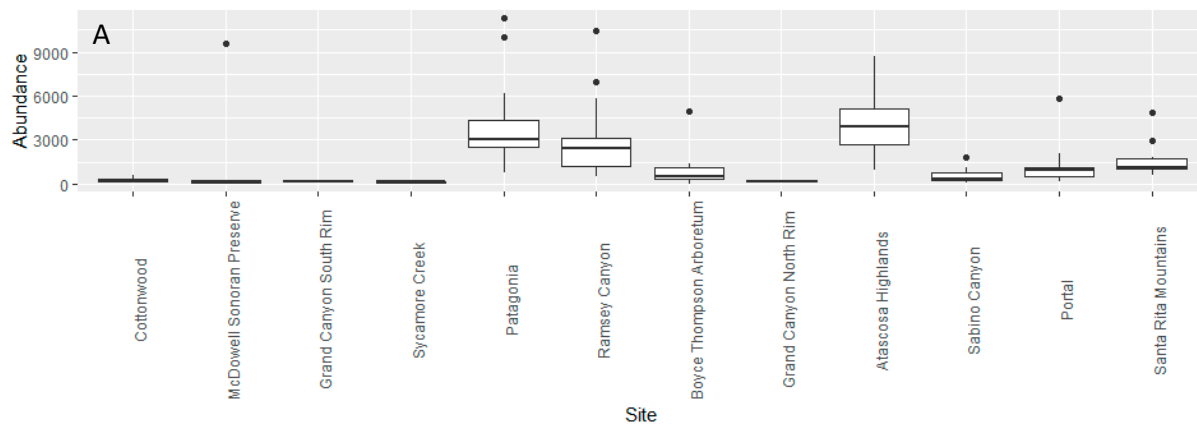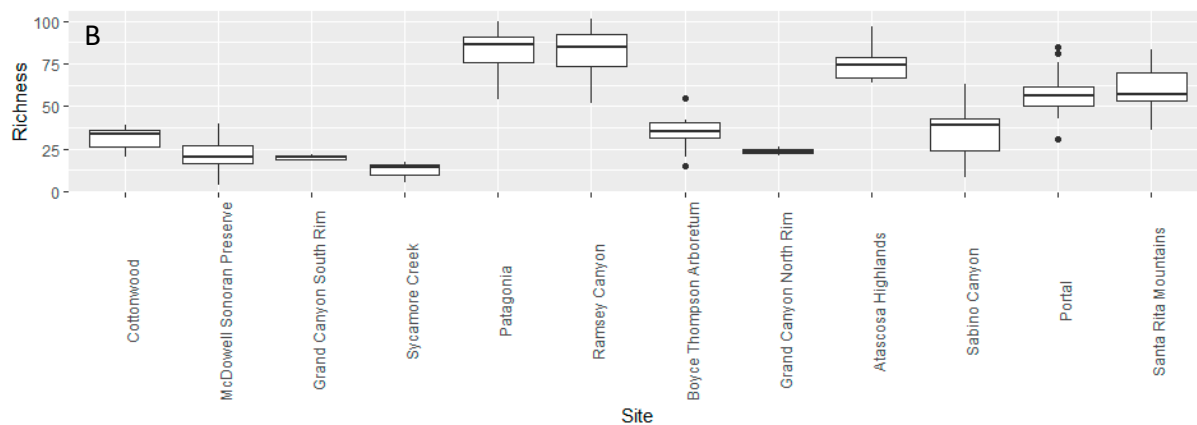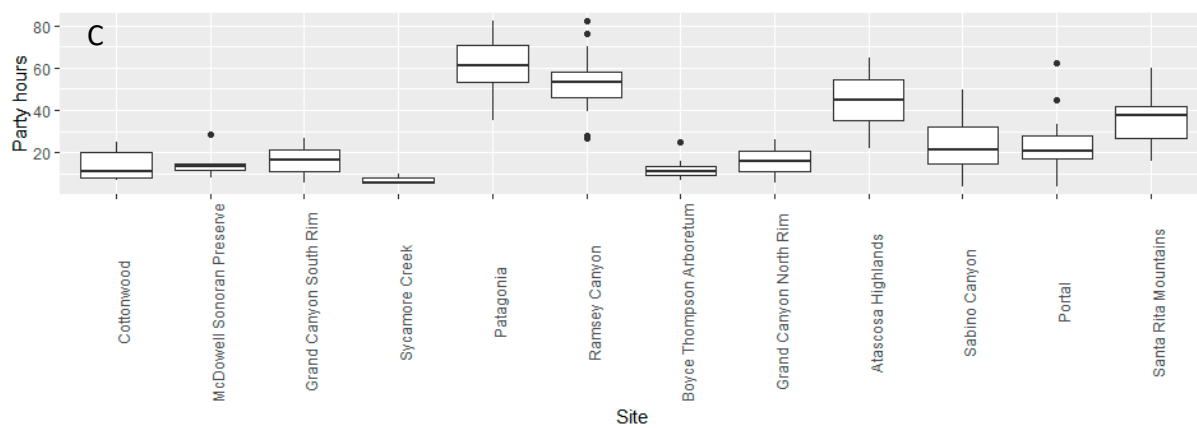

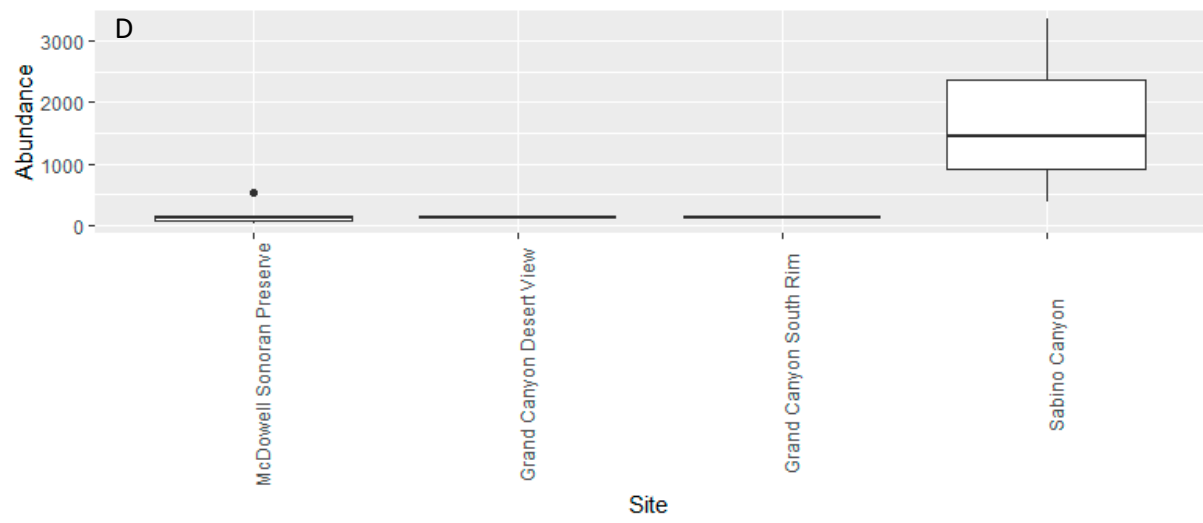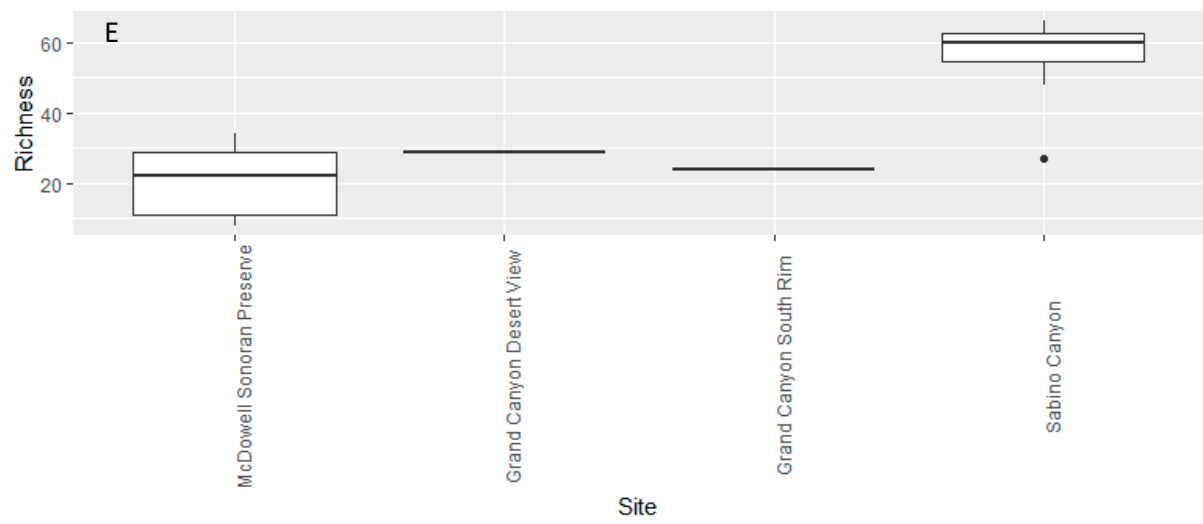

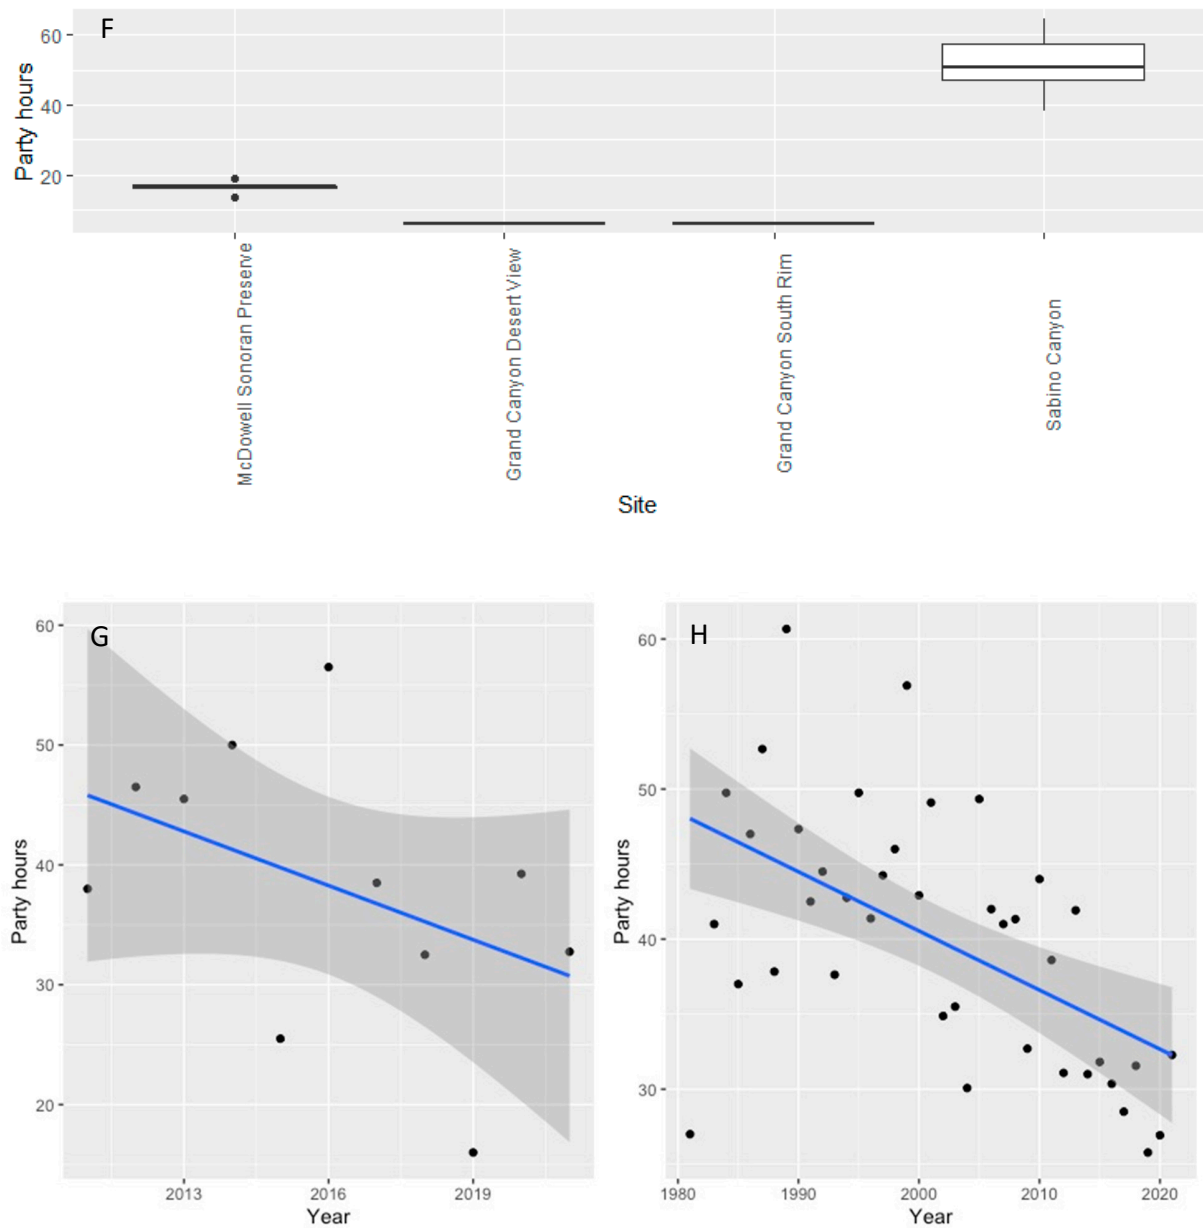

**Figure S1.** Distribution of mean butterfly abundance, richness, and party hours by site for seasonal surveys. Box plots show the (A) butterfly abundance, (B) butterfly richness, and (C) party hours for sites that conducted the summer/fall surveys averaged over time and (D) butterfly abundance and (E) butterfly richness, and (F) party hours of for sites that conducted spring surveys averaged over time, and party hours of (G) spring surveys and (H) summer/fall surveys over time, averaged over NABA survey sites. Sites in figures A-F are ordered left to right from driest to wettest based on the average annual precipitation for each site (Table 1). Summer/fall survey sites were included as random effects in the models to account for the different distributions. For the spring surveys, due to low sample size, they were not included as random effects, but models were compared with and without different sites instead. Party hours are calculated as the sum of the number of hours for each party on a single survey within site.

Party hours were included as fixed effects in all models. For plots A-F, boxes represent 50% of the values, the center line of the box represents the median value, each whisker represents 25% of the values, and dots are outliers. For plots G & H, each point represents the average value of all sites within that season/year. The lines represent trend lines with the shaded areas representing 95% confidence intervals.

**Table S2.** List of butterfly species seen in our surveys. The list follows NABA taxonomy for the southwestern United States. Species in bold were not on the original NABA taxonomy list, but added because they were observed in the NABA surveys and known to occur in this region. We collapsed subspecies to species in our analysis. An asterisk indicates instances of name changes and how they were collapsed. Season missing indicates that the species has not been seen in the last three years of surveys (2019-2021) within season indicated compared with baseline years (2011-2013 for spring surveys and 2002-2006 for fall surveys) across sites. A dash indicates that the species did not occur during the baseline or was not missing. Season seen indicates whether the species was seen between 2019-2021 and specifies the season seen. Species highlighted in red missing in years 2019-2021 compared to baseline within season and were also not seen in the other season in recent years (2019-2021). A dash indicates that the species was not seen during the 2019-2021 period (a dash in the season missing column and in the season seen column indicates that the species did not occur at all in the baseline and recent years).

| Family      | LatinAnalysisNameCorrected | NABAEnglishName                | Season missing  | Season seen |
|-------------|----------------------------|--------------------------------|-----------------|-------------|
| Hesperiidae | Achalarus casica           | desert cloudywing              | Spring          | Summer/Fall |
| Hesperiidae | Adopaeoides prittwitzi     | sunrise skipper                | -               | -           |
| Hesperiidae | Agathymus aryxna           | arizona giant skipper          | -               | Summer/Fall |
| Hesperiidae | Amblyscirtes aenus         | bronze roadside skipper        | -               | Summer/Fall |
| Hesperiidae | Amblyscirtes cassus        | cassus roadside skipper        | -               | Summer/Fall |
| Hesperiidae | Amblyscirtes elissa        | elissa roadside skipper        | -               | Summer/Fall |
| Hesperiidae | Amblyscirtes eos           | dotted roadside skipper        | Spring          | Summer/Fall |
| Hesperiidae | Amblyscirtes exoteria      | large roadside skipper         | -               | Summer/Fall |
| Hesperiidae | Amblyscirtes fimbriata     | orange edged roadside skipper  | -               | Summer/Fall |
| Hesperiidae | Amblyscirtes nereus        | slaty roadside skipper         | -               | Summer/Fall |
| Hesperiidae | Amblyscirtes nysa          | nysa roadside skipper          | -               | Summer/Fall |
| Hesperiidae | Amblyscirtes oslari        | oslar's roadside skipper       | -               | Summer/Fall |
| Hesperiidae | Amblyscirtes phylace       | orange headed roadside skipper | Summer/<br>Fall | -           |
| Hesperiidae | Amblyscirtes simius        | simius roadside skipper        | -               | -           |
| Hesperiidae | Amblyscirtes texanae       | texas roadside skipper         | -               | Summer/Fall |
| Hesperiidae | Amblyscirtes tolteca       | toltec roadside skipper        | -               | Summer/Fall |

|             |                         |                          |                 |                        |
|-------------|-------------------------|--------------------------|-----------------|------------------------|
| Hesperiidae | Ancyloxypha_arene       | tropical least skipper   | -               | Summer/Fall            |
| Hesperiidae | Atalopedes_campestris   | sachem                   | -               | Summer/Fall            |
| Hesperiidae | Atrytonopsis_cestus     | cestus skipper           | -               | -                      |
| Hesperiidae | Atrytonopsis_edwardsii  | sheep skipper            | Spring          | Summer/Fall            |
| Hesperiidae | Atrytonopsis_lunus      | moon marked skipper      | -               | Summer/Fall            |
| Hesperiidae | Atrytonopsis_pittacus   | white barred skipper     | -               | Spring&-               |
| Hesperiidae | Atrytonopsis_python     | python skipper           | -               | -                      |
| Hesperiidae | Autochton_cellus        | golden banded skipper    | -               | Summer/Fall            |
| Hesperiidae | Calpododes_ethlius      | brazilian skipper        | Summer/<br>Fall | -                      |
| Hesperiidae | Celotes_nessus          | common streaky skipper   | -               | Spring&Summer/<br>Fall |
| Hesperiidae | Chiodides_catillus      | white striped longtail   | Spring          | Summer/Fall            |
| Hesperiidae | Chiomara_asychis        | white patched skipper    | -               | Spring&Summer/<br>Fall |
| Hesperiidae | Codatractus_arizonensis | arizona skipper          | -               | Summer/Fall            |
| Hesperiidae | Codatractus_mysie       | valeriana skipper        | -               | Summer/Fall            |
| Hesperiidae | Cogia_caicus            | gold costa skipper       | -               | Summer/Fall            |
| Hesperiidae | Cogia_hippalus          | acacia skipper           | Spring          | Summer/Fall            |
| Hesperiidae | Copaeodes_aurantiacus   | orange skipperling       | -               | Spring&Summer/<br>Fall |
| Hesperiidae | Copaeodes_minimus       | southern skipperling     | -               | Summer/Fall            |
| Hesperiidae | Epargyreus_clarus       | silver spotted skipper   | -               | Spring&Summer/<br>Fall |
| Hesperiidae | Erynnis_afranius        | afranius duskywing       | -               | Summer/Fall            |
| Hesperiidae | Erynnis_brizo           | sleepy duskywing         | -               | Spring&-               |
| Hesperiidae | Erynnis_funeralis       | funereal duskywing       | -               | Spring&Summer/<br>Fall |
| Hesperiidae | Erynnis_icelus          | dreamy duskywing         | -               | -                      |
| Hesperiidae | Erynnis_juvenalis       | juvenal's duskywing      | Spring          | Summer/Fall            |
| Hesperiidae | Erynnis_meridianus      | meridian duskywing       | Spring          | Summer/Fall            |
| Hesperiidae | Erynnis_pacuvius        | pacuvius duskywing       | -               | Spring&Summer/<br>Fall |
| Hesperiidae | Erynnis_scudderi        | scudder's duskywing      | Summer/<br>Fall | -                      |
| Hesperiidae | Erynnis_telemachus      | rocky mountain duskywing | -               | -                      |
| Hesperiidae | Erynnis_tristis         | mournful duskywing       | -               | Spring&Summer/<br>Fall |
| Hesperiidae | Euphyes_vestris         | dun skipper              | -               | Summer/Fall            |

|             |                       |                            |             |                    |
|-------------|-----------------------|----------------------------|-------------|--------------------|
| Hesperiidae | Heliopetes_domicella  | erichson's white skipper   | -           | Spring&Summer/Fall |
| Hesperiidae | Heliopetes_ericetorum | northern white skipper     | -           | Summer/Fall        |
| Hesperiidae | Heliopetes_laviana    | laviana white skipper      | -           | Summer/Fall        |
| Hesperiidae | Hesperia_comma        | common branded skipper     | Summer/Fall | -                  |
| Hesperiidae | Hesperia_pahaska      | pahaska skipper            | -           | Spring&Summer/Fall |
| Hesperiidae | Hesperia_uncas        | uncas skipper              | -           | -                  |
| Hesperiidae | Hesperopsis_alpheus   | saltbush sootywing         | -           | Summer/Fall        |
| Hesperiidae | Hylephila_phyleus     | fiery skipper              | -           | Spring&Summer/Fall |
| Hesperiidae | Lerema_accius         | clouded skipper            | -           | Summer/Fall        |
| Hesperiidae | Lerodea_arabus        | violet clouded skipper     | -           | Spring&Summer/Fall |
| Hesperiidae | Lerodea_eufala        | eufala skipper             | -           | Spring&Summer/Fall |
| Hesperiidae | Megathymus_streckeri  | strecker's giant skipper   | -           | -                  |
| Hesperiidae | Megathymus_ursus      | ursine giant skipper       | -           | -                  |
| Hesperiidae | Oarisma_edwardsii     | edwards skipperling        | -           | Summer/Fall        |
| Hesperiidae | Oarisma_garita        | garita skipperling         | -           | Summer/Fall        |
| Hesperiidae | Ochlodes_sylvanoides  | woodland skipper           | -           | Summer/Fall        |
| Hesperiidae | Paratrytone_snowi     | snow's skipper             | -           | Summer/Fall        |
| Hesperiidae | Pholisora_catallus    | common sootywing           | -           | Spring&Summer/Fall |
| Hesperiidae | Piruna_cingo          | many spotted skipperling   | -           | Summer/Fall        |
| Hesperiidae | Piruna_pirus          | russet skipperling         | -           | -                  |
| Hesperiidae | Piruna_polingi        | four spotted skipperling   | -           | Summer/Fall        |
| Hesperiidae | Poanes_taxiles        | taxiles skipper            | -           | Summer/Fall        |
| Hesperiidae | Polites_carus         | carus skipper              | -           | Summer/Fall        |
| Hesperiidae | Polites_draco         | draco skipper              | -           | Summer/Fall        |
| Hesperiidae | Polites_themistocles  | tawny edged skipper        | -           | -                  |
| Hesperiidae | Polygonus_leo         | hammock skipper            | -           | Summer/Fall        |
| Hesperiidae | Pyrgus_albescens      | white checkered skipper    | -           | Spring&Summer/Fall |
| Hesperiidae | Pyrgus_communis       | common checkered skipper   | -           | -                  |
| Hesperiidae | Pyrgus_oileus         | tropical checkered skipper | -           | -                  |



|             |                       |                           |             |                    |
|-------------|-----------------------|---------------------------|-------------|--------------------|
| Hesperiidae | Pyrgus_philetas       | desert checkered skipper  | -           | Spring&Summer/Fall |
| Hesperiidae | Pyrgus_scriptura      | small checkered skipper   | Summer/Fall | -                  |
| Hesperiidae | Pyrrhopyge_araxes     | dull firetip              | -           | Summer/Fall        |
| Hesperiidae | Staphylus_ceos        | golden headed scallopwing | -           | Spring&Summer/Fall |
| Hesperiidae | Systasea_pulverulenta | texas powdered skipper    | Summer/Fall | -                  |
| Hesperiidae | Systasea_zampa        | arizona powdered skipper  | -           | Spring&Summer/Fall |
| Hesperiidae | Thorybes_drusus       | drusus cloudywing         | -           | Summer/Fall        |
| Hesperiidae | Thorybes_mexicanus    | mexican cloudywing        | -           | -                  |
| Hesperiidae | Thorybes_pylades      | northern cloudywing       | -           | Summer/Fall        |
| Hesperiidae | Urbanus_dorantes      | dorantes longtail         | -           | Summer/Fall        |
| Hesperiidae | Urbanus_proteus       | long tailed skipper       | Summer/Fall | -                  |
| Hesperiidae | Zestusa_dorus         | short tailed skipper      | Spring      | Summer/Fall        |
| Lycaenidae  | Agriades_glaucus      | arctic blue               | -           | -                  |
| Lycaenidae  | Atlides_halesus       | great purple hairstreak   | -           | Spring&Summer/Fall |
| Lycaenidae  | Brephidium_exile      | western pygmy blue        | -           | Spring&Summer/Fall |
| Lycaenidae  | Callophrys_augustinus | brown elfin               | -           | Spring&-           |
| Lycaenidae  | Callophrys_dumetorum  | canyon bramble hairstreak | -           | -                  |
| Lycaenidae  | Callophrys_gryneus    | juniper hairstreak        | -           | Spring&Summer/Fall |
| Lycaenidae  | Callophrys_spinetorum | thicket hairstreak        | -           | Spring&Summer/Fall |
| Lycaenidae  | Callophrys_xami       | xami hairstreak           | -           | -                  |
| Lycaenidae  | Celastrina_ladon      | spring azure              | -           | Spring&Summer/Fall |
| Lycaenidae  | Erora_quaderna        | arizona hairstreak        | -           | Spring&Summer/Fall |
| Lycaenidae  | Euphilotes_battoides  | square spotted blue       | -           | Spring&-           |
| Lycaenidae  | Euphilotes_rita       | rita blue                 | -           | -                  |
| Lycaenidae  | Euphilotes_spaldingi  | spalding's blue           | -           | Summer/Fall        |
| Lycaenidae  | Everes_amyntula       | western tailed blue       | -           | Summer/Fall        |
| Lycaenidae  | Everes_comyntas       | eastern tailed blue       | -           | -                  |
| Lycaenidae  | Glaucopsyche_lygdamus | silvery blue              | -           | -                  |

|                    |                            |                            |                 |                    |
|--------------------|----------------------------|----------------------------|-----------------|--------------------|
| Lycaenidae         | Hemiargus_ceraunus         | ceraunus blue              | -               | Spring&Summer/Fall |
| Lycaenidae         | Hemiargus_isola            | reakirt's blue             | -               | Spring&Summer/Fall |
| Lycaenidae         | Hypaurotis_crysalus        | colorado hairstreak        | -               | Summer/Fall        |
| Lycaenidae         | Leptotes_marina            | marine blue                | -               | Spring&Summer/Fall |
| Lycaenidae         | Lycaeides_melissa          | melissa blue               | -               | -                  |
| Lycaenidae         | Lycaena_arota              | tailed copper              | -               | Summer/Fall        |
| Lycaenidae         | Lycaena_heteronea          | blue copper                | -               | Summer/Fall        |
| Lycaenidae         | Lycaena_rubidus            | ruddy copper               | -               | -                  |
| Lycaenidae         | Ministrymon_leda           | leda ministreak            | -               | Summer/Fall        |
| Lycaenidae         | Plebejus_acmon_            | acmon blue                 | -               | Spring&Summer/Fall |
| Lycaenidae         | Plebejus_icarioides        | boisduval's blue           | -               | Summer/Fall        |
| Lycaenidae         | Plebejus_saepiolus         | greenish blue              | -               | Summer/Fall        |
| Lycaenidae         | Satyrrium_behrii           | behr's hairstreak          | -               | Summer/Fall        |
| Lycaenidae         | Strymon_istapa             | mallow scrub<br>hairstreak | -               | Summer/Fall        |
| Lycaenidae         | Strymon_melinus            | gray hairstreak            | -               | Spring&Summer/Fall |
| Lycaenidae         | Zizula_cyna                | cyna blue                  | Summer/<br>Fall | -                  |
| <b>Nymphalidae</b> | <b>Adelpha_bredowii*</b>   | <b>arizona sister</b>      | -               | <b>Summer/Fall</b> |
| Nymphalidae        | Agraulis_vanillae          | gulf fritillary            | -               | Spring&Summer/Fall |
| Nymphalidae        | Anaea_aidea                | tropical leafwing          | -               | Summer/Fall        |
| Nymphalidae        | Anaea_andria               | goatweed leafwing          | -               | -                  |
| Nymphalidae        | Anthanassa_campestris<br>* | field crescent             | -               | Summer/Fall        |
| Nymphalidae        | Anthanassa_mylitta*        | mylitta crescent           | -               | Spring&Summer/Fall |
| Nymphalidae        | Anthanassa_picta*          | painted crescent           | -               | Summer/Fall        |
| Nymphalidae        | Anthanassa_texana*         | texan crescent             | -               | Spring&Summer/Fall |
| Nymphalidae        | Anthanassa_tharos*         | pearl crescent             | -               | Summer/Fall        |
| Nymphalidae        | Anthanassa_vesta*          | vesta crescent             | -               | Summer/Fall        |
| Nymphalidae        | Asterocampa_celtis         | hackberry emperor          | -               | Summer/Fall        |
| Nymphalidae        | Asterocampa_clyton         | tawny emperor              | -               | Summer/Fall        |
| Nymphalidae        | Asterocampa_leilia         | empress leilia             | -               | Spring&Summer/Fall |
| Nymphalidae        | Cercyonis_meadii           | mead's wood nymph          | -               | -                  |
| Nymphalidae        | Cercyonis_oetus            | small wood nymph           | -               | Summer/Fall        |
| Nymphalidae        | Cercyonis_sthenele         | great basin wood<br>nymph  | -               | Summer/Fall        |

|                    |                         |                          |                         |                    |
|--------------------|-------------------------|--------------------------|-------------------------|--------------------|
| Nymphalidae        | Chlosyne_acastus        | sagebrush checkerspot    | -                       | Spring&-           |
| Nymphalidae        | Chlosyne_californica    | california patch         | -                       | Spring&Summer/Fall |
| Nymphalidae        | Chlosyne_lacinia        | bordered patch           | Spring                  | Summer/Fall        |
| Nymphalidae        | Coenonympha_tullia      | common ringlet           | -                       | -                  |
| Nymphalidae        | Cyllopsis_pertepida     | canyonland satyr         | -                       | Summer/Fall        |
| Nymphalidae        | Cyllopsis_pyracmon      | nabokov's satyr          | -                       | Summer/Fall        |
| <b>Nymphalidae</b> | <b>Danaus_eresimus</b>  | <b>soldier</b>           | <b>Summer/<br/>Fall</b> | -                  |
| Nymphalidae        | Danaus_gilippus         | queen                    | -                       | Spring&Summer/Fall |
| Nymphalidae        | Danaus_plexippus        | monarch                  | -                       | Spring&Summer/Fall |
| Nymphalidae        | Dymasia_dymas           | tiny checkerspot         | -                       | Spring&Summer/Fall |
| Nymphalidae        | Euphydryas_chalcedona   | variable checkerspot     | -                       | Spring&Summer/Fall |
| Nymphalidae        | Euptoieta_claudia       | variegated fritillary    | -                       | Spring&Summer/Fall |
| Nymphalidae        | Euptoieta_hegesia       | mexican fritillary       | Summer/<br>Fall         | -                  |
| Nymphalidae        | Gyrocheilus_patrobas    | red bordered satyr       | -                       | Summer/Fall        |
| Nymphalidae        | Junonia_coenia*         | common buckeye           | -                       | Spring&Summer/Fall |
| Nymphalidae        | Libytheana_carinenta    | american snout           | -                       | Spring&Summer/Fall |
| Nymphalidae        | Limenitis_archippus     | viceroy                  | Spring                  | Summer/Fall        |
| Nymphalidae        | Limenitis_arthemis      | red spotted admiral      | -                       | -                  |
| Nymphalidae        | Limenitis_weidemeyeri   | weidemeyer's admiral     | -                       | Summer/Fall        |
| <b>Nymphalidae</b> | <b>Marpesia_petreus</b> | <b>ruddy daggerwing</b>  | -                       | -                  |
| Nymphalidae        | Megisto_rubricata       | red satyr                | -                       | Summer/Fall        |
| Nymphalidae        | Mestra_amymone          | common mestra            | Summer/<br>Fall         | -                  |
| Nymphalidae        | Microtia_elva           | elf                      | -                       | Summer/Fall        |
| Nymphalidae        | Myscelia_cyananthe      | blackened bluewing       | -                       | -                  |
| Nymphalidae        | Nymphalis_antiopa       | mourning cloak           | -                       | Spring&Summer/Fall |
| Nymphalidae        | Nymphalis_californica   | california tortoiseshell | -                       | -                  |
| Nymphalidae        | Nymphalis_milberti      | milbert's tortoiseshell  | -                       | -                  |
| Nymphalidae        | Paramacera_allyni       | pine satyr               | -                       | Summer/Fall        |
| Nymphalidae        | Polydryas_arachne       | arachne checkerspot      | -                       | -                  |

|              |                               |                               |                 |                    |
|--------------|-------------------------------|-------------------------------|-----------------|--------------------|
| Nymphalidae  | Polygonia_gracilis            | zephyr hoary comma            | -               | -                  |
| Nymphalidae  | Polygonia_interrogatio<br>nis | question mark                 | -               | Summer/Fall        |
| Nymphalidae  | Polygonia_satyrus             | satyr comma                   | -               | Spring&Summer/Fall |
| Nymphalidae  | Speyeria_atlantis             | atlantis fritillary           | -               | Summer/Fall        |
| Nymphalidae  | Texola_elada                  | elada checkerspot             | -               | Spring&Summer/Fall |
| Nymphalidae  | Thessalia_cyneas              | black checkerspot             | -               | Spring&Summer/Fall |
| Nymphalidae  | Thessalia_fulvia              | fulvia checkerspot            | -               | Spring&-           |
| Nymphalidae  | Thessalia_theona              | theona checkerspot            | -               | Summer/Fall        |
| Nymphalidae  | Vanessa_annabella             | west coast lady               | -               | Spring&Summer/Fall |
| Nymphalidae  | Vanessa_atalanta              | red admiral                   | -               | Spring&Summer/Fall |
| Nymphalidae  | Vanessa_cardui                | painted lady                  | -               | Summer/Fall        |
| Nymphalidae  | Vanessa_virginiensis          | american lady                 | -               | Summer/Fall        |
| Papilionidae | Battus_philenor               | pipevine swallowtail          | -               | Summer/Fall        |
| Papilionidae | Papilio_indra                 | indra swallowtail             | -               | -                  |
| Papilionidae | Papilio_machaon*              | baird's old world swallowtail | -               | Summer/Fall        |
| Papilionidae | Papilio_multicaudata          | two tailed swallowtail        | -               | Summer/Fall        |
| Papilionidae | Papilio_polyxenes             | black swallowtail             | -               | Summer/Fall        |
| Papilionidae | Papilio_rumiko                | giant swallowtail             | -               | -                  |
| Papilionidae | Papilio_rutulus               | western tiger swallowtail     | -               | Summer/Fall        |
| Pieridae     | Anteos_clorinde               | white angled sulphur          | Summer/<br>Fall | -                  |
| Pieridae     | Anthocharis_cethura           | pima orangetip                | -               | -                  |
| Pieridae     | Anthocharis_sara              | sara orangetip                | -               | -                  |
| Pieridae     | Appias_drusilla               | florida white                 | -               | -                  |
| Pieridae     | Ascia_monuste                 | great southern white          | -               | Summer/Fall        |
| Pieridae     | Colias_cesonia                | southern dogface              | -               | Summer/Fall        |
| Pieridae     | Colias_eurytheme              | orange sulphur                | -               | Summer/Fall        |
| Pieridae     | Colias_philodice              | clouded sulphur               | -               | Summer/Fall        |
| Pieridae     | Euchloe_hyantis               | desert pearly marble          | -               | -                  |
| Pieridae     | Eurema_boisduvaliana          | boisduval's yellow            | -               | Summer/Fall        |
| Pieridae     | Eurema_daira                  | barred yellow                 | -               | -                  |
| Pieridae     | Eurema_dina                   | dina yellow                   | -               | -                  |
| Pieridae     | Eurema_lisa                   | little yellow                 | -               | -                  |
| Pieridae     | Eurema_mexicana               | mexican yellow                | -               | Summer/Fall        |

|            |                        |                          |                 |             |
|------------|------------------------|--------------------------|-----------------|-------------|
| Pieridae   | Eurema_nicippe         | sleepy orange            | -               | Summer/Fall |
| Pieridae   | Eurema_nise            | mimosa yellow            | -               | Summer/Fall |
| Pieridae   | Eurema_proterpia       | tailed orange            | -               | Summer/Fall |
| Pieridae   | Kricogonia_lyside      | lyside sulphur           | -               | Summer/Fall |
| Pieridae   | Nathalis_iole          | dainty sulphur           | -               | Summer/Fall |
| Pieridae   | Neophasia_menapia      | pine white               | -               | Summer/Fall |
| Pieridae   | Neophasia_terlootii    | chiricahua white         | -               | Summer/Fall |
| Pieridae   | Phoebis_agarithe       | large orange sulphur     | -               | Summer/Fall |
| Pieridae   | Phoebis_philea         | orange barred sulphur    | -               | -           |
| Pieridae   | Phoebis_sennae         | cloudless sulphur        | -               | Summer/Fall |
| Pieridae   | Pieris_napi            | marginated mustard white | Summer/<br>Fall | -           |
| Pieridae   | Pieris_rapae           | cabbage white            | -               | Summer/Fall |
| Pieridae   | Pontia_beckerii        | becker's white           | -               | -           |
| Pieridae   | Pontia_protodice       | checkered white          | -               | Summer/Fall |
| Pieridae   | Pontia_sisymbrii       | spring white             | -               | -           |
| Riodinidae | Apodemia_hepburni      | hepburn's metalmark      | -               | -           |
| Riodinidae | Apodemia_mormo         | mormon metalmark         | -               | Summer/Fall |
| Riodinidae | Apodemia_nais          | nais metalmark           | -               | Summer/Fall |
| Riodinidae | Apodemia_palmeri       | palmer's metalmark       | -               | Summer/Fall |
| Riodinidae | Calephelis_arizonensis | arizona metalmark        | -               | Summer/Fall |
| Riodinidae | Calephelis_nemesis     | fatal metalmark          | Spring          | Summer/Fall |
| Riodinidae | Emesis_ares            | ares metalmark           | -               | Summer/Fall |
| Riodinidae | Emesis_zela            | zela metalmark           | -               | Summer/Fall |

\*Note the following name changes from how they were identified in the NABA dataset to listings in this table and considered in the dataset (NABA to corrected name): *Adelpha eulalia* to *Adelpha bredowii*, *Junonia genoveva* to *Junonia coenia*, *Papilio machaon bairdii* to *Papilio machaon*, *Papilio cressphontes* to *Papilio Rumiko*, genus *Phyciodes* to *Anthanassa*

**Table S3.** Climate variables and descriptions considered for inclusion in the final model. These variables were all included in the forward stepwise regression to identify the final predictor variables in the final model

| Variable(s)                                        | Description                                                                          |
|----------------------------------------------------|--------------------------------------------------------------------------------------|
| Maximum Temperature                                | The highest recorded temperature (°C) for the survey day                             |
| Maximum Temperature of the previous 30/90/365 Days | The warmest temperature (°C) recorded in the 30/90/365 days prior to the survey date |
| Mean Temperature                                   | The mean temperature (°C) for the survey day                                         |

|                                                    |                                                                                                                                                                                                                                                                                  |
|----------------------------------------------------|----------------------------------------------------------------------------------------------------------------------------------------------------------------------------------------------------------------------------------------------------------------------------------|
| Mean Temperature of the Previous 30/90/365 Days    | The mean temperature (°C) over the 30/90/365 days prior to the survey date                                                                                                                                                                                                       |
| Minimum Temperature                                | The lowest recorded temperature (°C) for the survey day                                                                                                                                                                                                                          |
| Minimum Temperature of the Previous 30/90/365 Days | The coldest temperature (°C) recorded in the 30/90/365 days prior to the survey date                                                                                                                                                                                             |
| Monsoon Season Maximum Temperature                 | The maximum temperature (°C) in the monsoon season (July-September) prior to the survey date                                                                                                                                                                                     |
| Monsoon Season Mean Temperature                    | The mean temperature (°C) in the monsoon season (July-September) prior to the survey date                                                                                                                                                                                        |
| Monsoon Season Minimum Temperature                 | The minimum temperature (°C) in the monsoon season (July-September) prior to the survey date                                                                                                                                                                                     |
| Monsoon Season Precipitation                       | The total precipitation (mm) in the monsoon season (July-September) prior to the survey date                                                                                                                                                                                     |
| Precipitation                                      | Precipitation on the survey day (mm)                                                                                                                                                                                                                                             |
| Precipitation total of the previous 30/90/365 days | The precipitation total (mm) in the 30/90/365 days prior to the survey date                                                                                                                                                                                                      |
| Previous 30/90/365 Days above 28                   | The total number of days that reached a temperature above 28 (°C) in the 30/90/365 days prior to the survey date                                                                                                                                                                 |
| Previous 30/90/365 Days above 30                   | The total number of days that reached a temperature above 30 (°C) in the 30/90/365 days prior to the survey date                                                                                                                                                                 |
| Recent Precipitation 1                             | The precipitation (mm) of the most recent rainy season relative to the sampling date. For March to July, the most recent was the winter rains, for August and September, the most recent was the previous 90 days, and for October, the most recent was the recent monsoon rains |
| Recent Precipitation 2                             | The same as Recent Precipitation 1, except the most recent rains for August were the previous winter rains.                                                                                                                                                                      |
| Winter Season Maximum Temperature                  | The maximum temperature (°C) in the winter season (October-April) previous to the survey date                                                                                                                                                                                    |
| Winter Season Mean Temperature                     | The mean temperature (°C) in the winter season (October-April) previous to the survey date                                                                                                                                                                                       |

|                                      |                                                                                               |
|--------------------------------------|-----------------------------------------------------------------------------------------------|
| Winter Season<br>Minimum Temperature | The minimum temperature (°C) in the winter season (October-April) previous to the survey date |
| Winter Season<br>Precipitation       | The total precipitation (mm) in the Winter season (October-April) previous to the survey date |

**Table S4.** Linear mixed model output table for summer/fall survey butterfly abundance. Site was included as a random effect in this model. Asterisks represent significance at the following levels: \*\*\* =  $p < 0.001$ ; \*\* =  $p < 0.01$ ; \* =  $p < 0.05$ ; ^ =  $p < 0.10$ .

| Fixed Effects               | Estimate | Standard Error | Degrees of Freedom | t Value | Pr(> t )       |
|-----------------------------|----------|----------------|--------------------|---------|----------------|
| Intercept                   | 41.7007  | 13.220         | 148.634            | 3.154   | 0.0019 **      |
| Year                        | -0.0181  | 0.0066         | 143.789            | -2.725  | 0.0072**       |
| Min Temp (Previous 30 days) | 0.0342   | 0.0416         | 79.982             | 0.821   | 0.4140         |
| Max Temp (Previous 30 days) | -0.0283  | 0.0364         | 168.141            | -0.777  | 0.4384         |
| Monsoon Precipitation       | 0.0024   | 0.0007         | 173.693            | 3.438   | 0.0007 **      |
| Winter Precipitation        | -0.0001  | 0.0005         | 172.885            | -0.097  | 0.9227         |
| Party Hours                 | 0.0360   | 0.0044         | 81.775             | 8.074   | <0.0001<br>*** |

Significance codes: 0 '\*\*\*' 0.001 '\*\*' 0.01 '\*' 0.05 '.'

**Table S5.** General linear model output table for spring survey butterfly abundance. Asterisks represent significance at the following levels: \*\*\* =  $p < 0.001$ ; \*\* =  $p < 0.01$ ; \* =  $p < 0.05$ ; ^ =  $p < 0.10$ .

| Fixed Effects               | Estimate | Standard Error | t Value | Pr(> t )   |
|-----------------------------|----------|----------------|---------|------------|
| Intercept                   | 197.4916 | 105.355        | 1.875   | 0.0903 ^   |
| Year                        | -0.0949  | 0.0517         | -1.836  | 0.0962 ^   |
| Min Temp (Previous 30 days) | -0.0294  | 0.0539         | -0.545  | 0.5978     |
| Max Temp (Previous 30 days) | -0.0826  | 0.0786         | -1.050  | 0.3184     |
| Monsoon Precipitation       | -0.0002  | 0.0013         | -0.152  | 0.8821     |
| Winter Precipitation        | 0.0037   | 0.0014         | 2.703   | 0.0221 *   |
| Party Hours                 | 0.0472   | 0.0098         | 4.821   | 0.0007 *** |



**Table S6.** General linear model output table for spring survey butterfly richness. Asterisks represent significance at the following levels: \*\*\* =  $p < 0.001$ ; \*\* =  $p < 0.01$ ; \* =  $p < 0.05$ ; ^ =  $p < 0.10$ .

| Fixed Effects               | Estimate  | Standard Error | t Value | Pr(> t )    |
|-----------------------------|-----------|----------------|---------|-------------|
| Intercept                   | 4331.1170 | 1146.1705      | 3.779   | 0.0036 **   |
| Year                        | -2.1393   | 0.5625         | -3.803  | 0.0035 **   |
| Min Temp (Previous 30 days) | -0.8376   | 0.5874         | -1.426  | 0.1843      |
| Max Temp (Previous 30 days) | -0.0968   | 0.8561         | -0.113  | 0.9122      |
| Monsoon Precipitation       | -0.0313   | 0.0144         | -2.162  | 0.0560 ^    |
| Winter Precipitation        | 0.0423    | 0.0151         | 2.784   | 0.0193 *    |
| Party Hours                 | 0.7466    | 0.1065         | 7.007   | <0.0001 *** |

**Table S7.** Linear mixed model output table for summer/fall survey butterfly richness. Site was included as a random effect in this model. Asterisks represent significance at the following levels: \*\*\* =  $p < 0.001$ ; \*\* =  $p < 0.01$ ; \* =  $p < 0.05$ ; ^ =  $p < 0.10$ .

| Fixed Effects               | Estimate | Standard Error | Degrees of Freedom | t Value | Pr(> t )    |
|-----------------------------|----------|----------------|--------------------|---------|-------------|
| Intercept                   | -2.636   | 13.5925        | 173.1268           | -0.194  | 0.8465      |
| Year                        | 0.0050   | 0.0068         | 1743.823           | 0.728   | 0.4676      |
| Min Temp (Previous 30 days) | 0.0148   | 0.0479         | 163.606            | 0.309   | 0.7574      |
| Max Temp (Previous 30 days) | -0.0739  | 0.0367         | 172.3101           | -2.011  | 0.0459 *    |
| Monsoon Precipitation       | 0.0006   | 0.0007         | 169.3826           | 0.903   | 0.3680      |
| Winter Precipitation        | 0.0016   | 0.0004         | 165.2866           | 3.294   | 0.0012 ***  |
| Party Hours                 | 0.0390   | 0.0049         | 174.9570           | 7.956   | <0.0001 *** |

**Table S8.** Variance Inflation Factor (VIF) Output for each model. Summer/fall models have different VIF values for the abundance and richness models because they include a random factor.

| Model                               | Year  | Min Temp<br>(Previous 30<br>days) | Max Temp<br>(Previous 30<br>days) | Monsoon<br>Precipitation | Winter<br>Precipitation | Party<br>Hours |
|-------------------------------------|-------|-----------------------------------|-----------------------------------|--------------------------|-------------------------|----------------|
| Summer/Fall<br>Abundance            | 1.097 | 1.189                             | 1.399                             | 1.203                    | 1.109                   | 1.030          |
| Fall Richness                       | 1.157 | 1.112                             | 1.234                             | 1.173                    | 1.117                   | 1.044          |
| Spring<br>Abundance and<br>Richness | 1.441 | 1.930                             | 1.963                             | 1.823                    | 1.247                   | 2.364          |
